# Supplementary material
Source: PubMed Central journal article supplement (PMC5858744)
Supplement: NIHMS926146-supplement-ESI.pdf [file NIHMS926146-supplement-ESI.pdf]

Supporting Information

Separation of Saturated Fatty Acids and Fatty Acid Methyl Esters with Epoxy Nanofiltration  
Membranes

Chad M. Gilmer, Christina Zvokel, Alexandra Vick and Ned B. Bowden

Department of Chemistry

*University of Iowa, Iowa City, IA, 52242*

[ned-bowden@uiowa.edu](mailto:ned-bowden@uiowa.edu)

## Table of Contents

|                                                                                                                       | Page  |
|-----------------------------------------------------------------------------------------------------------------------|-------|
| Permeation of fatty acids through an epoxy membrane in a diffusion apparatus.                                         | S-3-5 |
| Permeation of fatty acid methyl esters through an epoxy membrane in a diffusion apparatus.                            | S-5-6 |
| $^1\text{H}$ NMR and $^{13}\text{C}$ NMR spectrums of methyl undecylenate.                                            | S-6-7 |
| AFM images of a spin-coated epoxy membrane                                                                            | S-7-8 |
| Permeation of FAMES through membranes A-2 and A-2 $^{13}\text{C}_3$ in a pressure apparatus.                          | S-8-9 |
| Permeation of $\text{C}_{10}$ - $\text{C}_{18}$ even chain length FAMES through membrane A-2 in a pressure apparatus. | S-10  |

**Permeation of fatty acids through an epoxy membrane in a diffusion apparatus.**

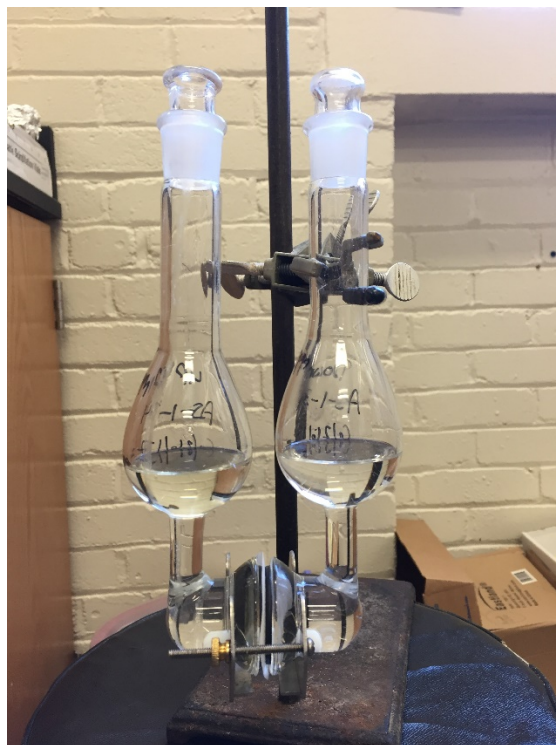

**Fig S1.** Diffusion apparatus used to monitor the flux of FAs and FAMES through the epoxy membrane.

**Table S1.** Initial screening of the permeation of model fatty acids through epoxy membranes.

| Molecules        | Membrane | Relative Flux | Normalized Flux<br>(mol/cm <sup>2</sup> *h) <sup>a</sup> |
|------------------|----------|---------------|----------------------------------------------------------|
| Butyric Acid     | A-1      | 5.84          | 2.83 x 10 <sup>-6</sup>                                  |
| Undecylenic Acid |          | 1.75          | 8.49 x 10 <sup>-7</sup>                                  |
| Stearic Acid     |          | 1             | 4.85 x 10 <sup>-7</sup>                                  |
| Butyric Acid     | A-2      | 7.02          | 9.90 x 10 <sup>-7</sup>                                  |
| Undecylenic Acid |          | 3.01          | 4.24 x 10 <sup>-7</sup>                                  |
| Stearic Acid     |          | 1.00          | 1.41 x 10 <sup>-7</sup>                                  |
| Butyric Acid     | A-3      | 21.4          | 4.24 x 10 <sup>-7</sup>                                  |
| Undecylenic Acid |          | 4.29          | 8.49 x 10 <sup>-8</sup>                                  |
| Stearic Acid     |          | 1.00          | 1.98 x 10 <sup>-8</sup>                                  |

<sup>a</sup>All flux values carry a ± 4.24% relative error.

**Table S2.** Permeation of model fatty acids through epoxy membranes fabricated with epoxides 1 and 3.

| Molecule         | Membrane                        | Relative Flux | Normalized Flux<br>(mol/cm <sup>2</sup> *h) <sup>a</sup> |
|------------------|---------------------------------|---------------|----------------------------------------------------------|
| Butyric acid     | A-1 <sup>3</sup> 3 <sup>1</sup> | 7.97          | 1.41 x 10 <sup>-6</sup>                                  |
| Undecylenic acid |                                 | 3.20          | 5.66 x 10 <sup>-7</sup>                                  |
| Stearic acid     |                                 | 1.00          | 1.77 x 10 <sup>-7</sup>                                  |
| Butyric acid     | A-1 <sup>1</sup> 3 <sup>1</sup> | 16.6          | 1.41 x 10 <sup>-6</sup>                                  |
| Undecylenic acid |                                 | 4.99          | 4.24 x 10 <sup>-7</sup>                                  |
| Stearic acid     |                                 | 1.00          | 8.49 x 10 <sup>-8</sup>                                  |
| Butyric acid     | A-1 <sup>1</sup> 3 <sup>3</sup> | 22.5          | 8.49 x 10 <sup>-7</sup>                                  |
| Undecylenic acid |                                 | 7.51          | 2.83 x 10 <sup>-7</sup>                                  |
| Stearic acid     |                                 | 1.00          | 3.77 x 10 <sup>-8</sup>                                  |

<sup>a</sup>All flux values carry a ± 4.24% relative error.

**Table S3.** Permeation of model fatty acids through epoxy membranes fabricated with epoxides 2 and 3.

| Molecule         | Membrane                        | Relative Flux | Normalized Flux<br>(mol/cm <sup>2</sup> *h) <sup>a</sup> |
|------------------|---------------------------------|---------------|----------------------------------------------------------|
| Butyric acid     | A-2 <sup>3</sup> 3 <sup>1</sup> | 30.0          | 8.49 x 10 <sup>-7</sup>                                  |
| Undecylenic acid |                                 | 4.98          | 1.41 x 10 <sup>-7</sup>                                  |
| Stearic acid     |                                 | 1.00          | 2.83 x 10 <sup>-8</sup>                                  |
| Butyric acid     | A-2 <sup>1</sup> 3 <sup>1</sup> | 20.0          | 8.49 x 10 <sup>-7</sup>                                  |
| Undecylenic acid |                                 | 3.33          | 1.41 x 10 <sup>-7</sup>                                  |
| Stearic acid     |                                 | 1.00          | 4.24 x 10 <sup>-8</sup>                                  |
| Butyric acid     | A-2 <sup>1</sup> 3 <sup>3</sup> | 60.2          | 8.49 x 10 <sup>-7</sup>                                  |
| Undecylenic acid |                                 | 8.01          | 1.13 x 10 <sup>-7</sup>                                  |
| Stearic acid     |                                 | 1.00          | 1.41 x 10 <sup>-8</sup>                                  |

<sup>a</sup>All flux values carry a ± 4.24% relative error.

**Table S4.** Permeation of model fatty acids through epoxy membranes fabricated with epoxides 1 and 2.

| Molecule         | Membrane                        | Relative Flux | Normalized Flux<br>(mol/cm <sup>2</sup> *h) <sup>a</sup> |
|------------------|---------------------------------|---------------|----------------------------------------------------------|
| Butyric acid     | A-1 <sup>1</sup> 2 <sup>3</sup> | 6.67          | 2.83 x 10 <sup>-6</sup>                                  |
| Undecylenic acid |                                 | 3.00          | 1.27 x 10 <sup>-6</sup>                                  |
| Stearic acid     |                                 | 1.00          | 4.24 x 10 <sup>-7</sup>                                  |
| Butyric acid     | A-1 <sup>1</sup> 2 <sup>1</sup> | 4.99          | 4.24 x 10 <sup>-6</sup>                                  |
| Undecylenic acid |                                 | 1.67          | 1.41 x 10 <sup>-6</sup>                                  |
| Stearic acid     |                                 | 1.00          | 8.49 x 10 <sup>-7</sup>                                  |
| Butyric acid     | A-1 <sup>3</sup> 2 <sup>1</sup> | 6.67          | 3.77 x 10 <sup>-6</sup>                                  |
| Undecylenic acid |                                 | 3.00          | 1.70 x 10 <sup>-6</sup>                                  |
| Stearic acid     |                                 | 1.00          | 5.66 x 10 <sup>-7</sup>                                  |

<sup>a</sup>All flux values carry a ± 4.24% relative error.

**Permeation of fatty acid methyl esters (FAMES) through a membrane in a diffusion apparatus.**

**Table S5.** Permeation of saturated FAMES through membrane A-2<sup>1</sup>3<sup>3</sup>

| Molecule                            | Relative Flux | Normalized Flux<br>(mol/cm <sup>2</sup> *h) <sup>a</sup> |
|-------------------------------------|---------------|----------------------------------------------------------|
| Methyl butyrate (C <sub>4</sub> )   | 100           | 9.90 x 10 <sup>-8</sup>                                  |
| Methyl hexanoate (C <sub>6</sub> )  | 57.1          | 5.66 x 10 <sup>-8</sup>                                  |
| Methyl octanoate (C <sub>8</sub> )  | 28.6          | 2.83 x 10 <sup>-8</sup>                                  |
| Methyl decanoate (C <sub>10</sub> ) | 14.3          | 1.41 x 10 <sup>-8</sup>                                  |
| Methyl laurate (C <sub>12</sub> )   | 8.58          | 8.49 x 10 <sup>-9</sup>                                  |
| Methyl myristate (C <sub>14</sub> ) | 4.28          | 4.24 x 10 <sup>-9</sup>                                  |
| Methyl palmitate (C <sub>16</sub> ) | 2.86          | 2.83 x 10 <sup>-9</sup>                                  |
| Methyl stearate (C <sub>18</sub> )  | 1.00          | 9.90 x 10 <sup>-10</sup>                                 |

<sup>a</sup>All flux values carry a ± 4.24% relative error.

**Table S6.** Permeation of saturated FAMES through membrane A-1<sup>13</sup>

| Molecule                            | Relative Flux | Normalized Flux (mol/cm <sup>2</sup> *h) <sup>a</sup> |
|-------------------------------------|---------------|-------------------------------------------------------|
| Methyl butyrate (C <sub>4</sub> )   | 49.8          | 1.41 x 10 <sup>-7</sup>                               |
| Methyl hexanoate (C <sub>6</sub> )  | 28.3          | 8.49 x 10 <sup>-8</sup>                               |
| Methyl octanoate (C <sub>8</sub> )  | 18.9          | 5.66 x 10 <sup>-8</sup>                               |
| Methyl decanoate (C <sub>10</sub> ) | 10.0          | 2.83 x 10 <sup>-8</sup>                               |
| Methyl laurate (C <sub>12</sub> )   | 4.70          | 1.41 x 10 <sup>-8</sup>                               |
| Methyl myristate (C <sub>14</sub> ) | 3.50          | 9.90 x 10 <sup>-9</sup>                               |
| Methyl palmitate (C <sub>16</sub> ) | 1.89          | 5.66 x 10 <sup>-9</sup>                               |
| Methyl stearate (C <sub>18</sub> )  | 1.00          | 2.83 x 10 <sup>-9</sup>                               |

<sup>a</sup>All flux values carry a ± 4.24% relative error.

**<sup>1</sup>H NMR and <sup>13</sup>C NMR spectrums of methyl undecylenate.**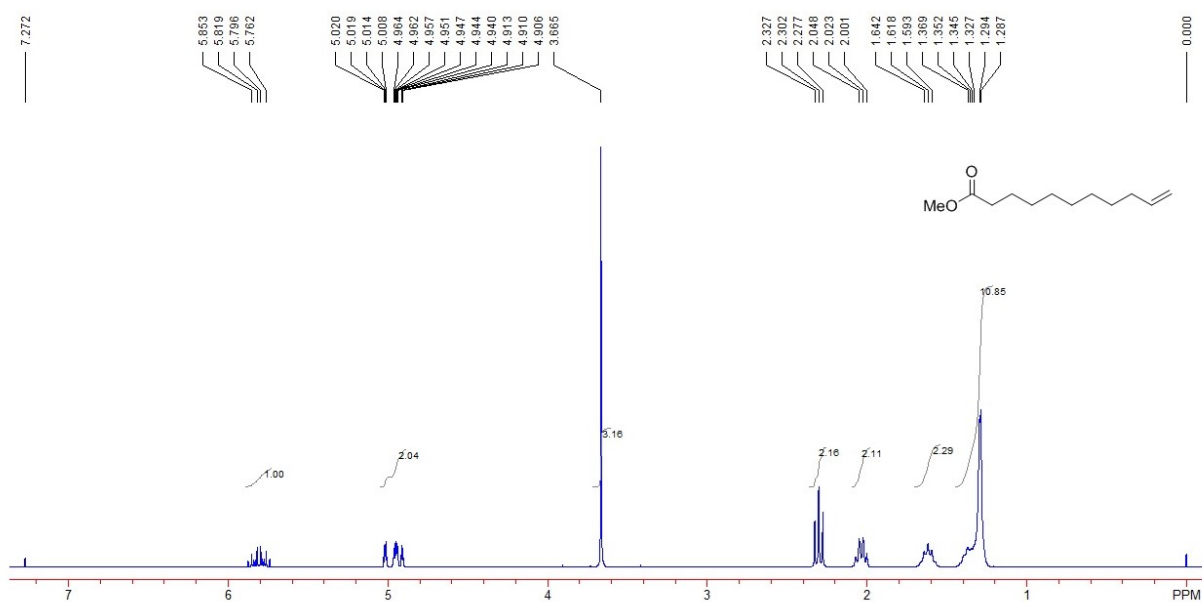**Figure S2.** <sup>1</sup>H NMR spectrum of methyl undecylenate in CDCl<sub>3</sub>.

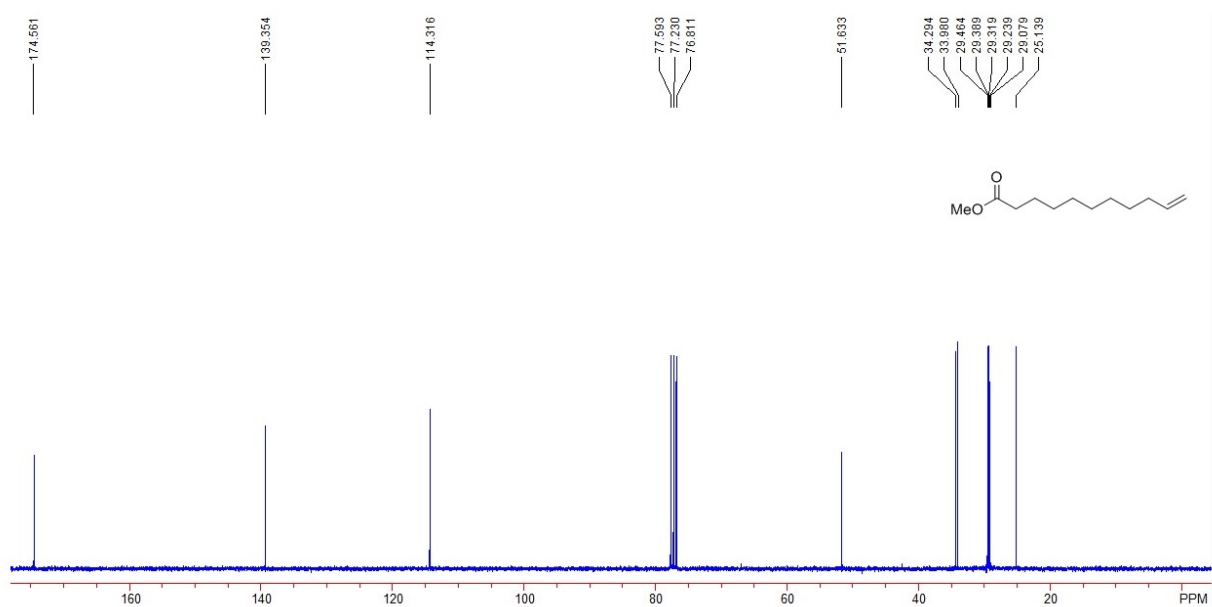

**Figure S3.**  $^{13}\text{C}$  NMR spectrum of methyl undecylenate in  $\text{CDCl}_3$ .

**AFM images of spin-coated epoxy membrane A-2.**

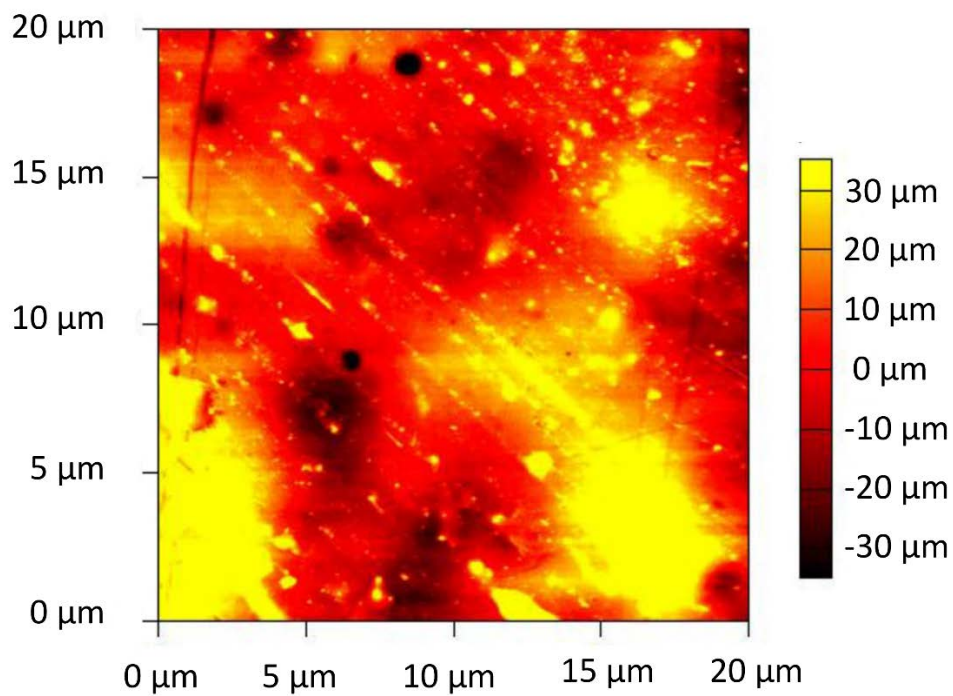

**Figure S4.** 2D AFM image showing the changes in height on the surface of a spin-coated epoxy membrane A-2.

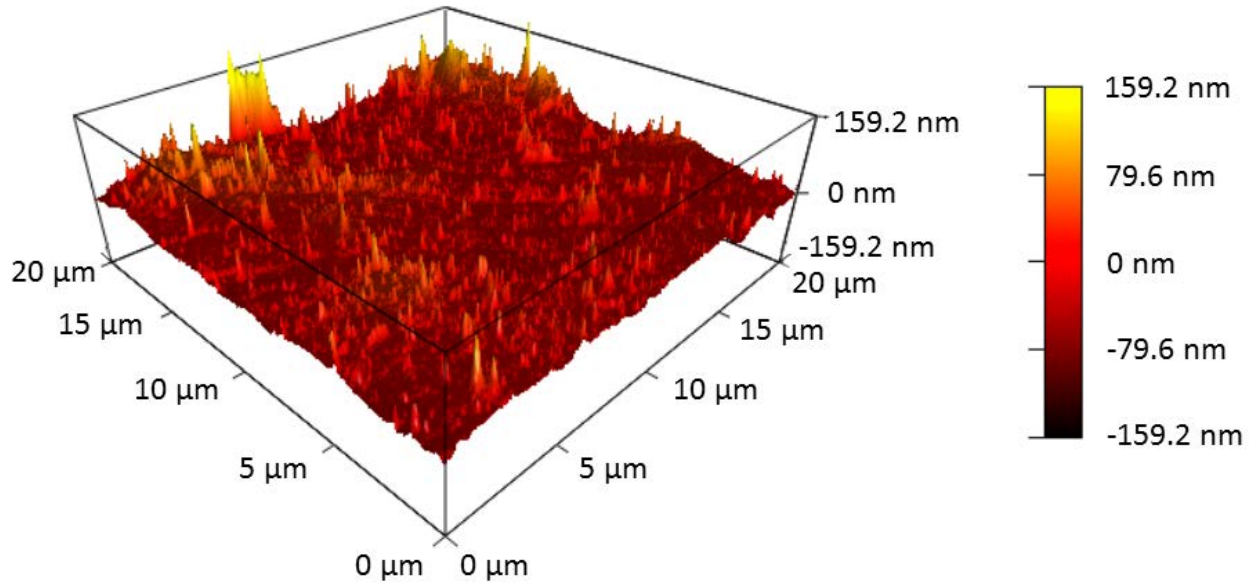

**Figure S5.** 3D AFM image showing the changes in height on the surface of a spin-coated epoxy membrane.

**Permeation of methyl undecylenate and methyl stearate through membrane A-2 in a pressure apparatus.**

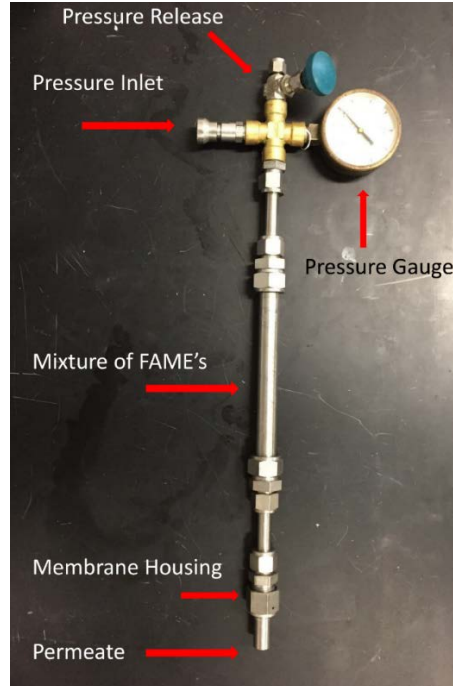

**Figure S6.** Dead end-filtration apparatus for high pressure experiments



**Table S7.** Composition of FAMEs collected in the pressure experiment with membrane A-2.

|                         | Mass of FAMEs<br>(mg) | Methyl Undecylenate<br>(mol%) | Methyl Stearate<br>(mol %) |
|-------------------------|-----------------------|-------------------------------|----------------------------|
| Initial <sup>a</sup>    | 1,860                 | 49.9                          | 50.1                       |
| Fraction 1              | 38.0                  | 67.9                          | 32.1                       |
| Fraction 2              | 42.3                  | 68.5                          | 31.5                       |
| Fraction 3              | 44.3                  | 67.7                          | 32.3                       |
| Fraction 4              | 85.1                  | 70.0                          | 30.0                       |
| Fraction 5 <sup>b</sup> | 60.7                  | 62.2                          | 37.8                       |
| Total Permeate          | 270                   | 67.4                          | 32.6                       |
| Retention               | 1,480                 | 45.5                          | 54.5                       |

<sup>a</sup>Initial composition was determined by removing a 1 mL sample of the initial mixture and analyzing via <sup>1</sup>H NMR spectroscopy.

<sup>b</sup>Fraction 5 is the sample that was on the permeate side of the dead-end filtration and did not go into the vial. This sample was collected by washing the end of the metal apparatus with DCM and removing DCM to obtain the FAMEs.

**Table S8.** Composition of FAME's collected in the pressure experiment with membrane A-2<sup>133</sup>.

|                         | Mass of<br>FAME's and<br>FAEE (mg) | Methyl<br>Hexanoate<br>(mol%) | Methyl<br>Undecylenate<br>(mol%) | Ethyl Stearate <sup>d</sup><br>(mol%) |
|-------------------------|------------------------------------|-------------------------------|----------------------------------|---------------------------------------|
| Initial <sup>a</sup>    | 2,380                              | 32.8                          | 33.1                             | 34.1                                  |
| Fraction 1              | 12.0                               | 17.7 <sup>c</sup>             | 62.1                             | 20.2                                  |
| Fraction 2 <sup>b</sup> | 53.6                               | 30.6 <sup>c</sup>             | 52.5                             | 16.8                                  |
| Retention               | 2,110                              | 32.3                          | 32.2                             | 35.4                                  |

<sup>a</sup>Initial composition was determined by removing a 1 mL sample of the initial mixture and analyzing via <sup>1</sup>H NMR spectroscopy.

<sup>b</sup>Fraction 2 is the sample that was on the permeate side of the dead-end filtration and did not go into the vial. This sample was collected by washing the end of the metal apparatus with DCM and removing DCM to obtain the FAMEs.

<sup>c</sup>Due to the low boiling point of methyl hexanoate, it had evaporated from the permeate side before analysis could be completed.

<sup>d</sup>Ethyl stearate was used in this experiment because it has a unique peak in the <sup>1</sup>H NMR spectrum that so it can be distinguished from the other two FAMEs being used.

**Permeation of a multicomponent mixture of FAMES through epoxy membrane A-2 in a pressure apparatus.**

**Table S9.** Composition of FAMES collected in the pressure experiment with membrane A-2.

|                         | Mass of FAMES (mg) | Methyl Decanoate (mol%) | Methyl Laurate (mol %) | Methyl Myristate (mol%) | Methyl Palmitate (mol%) | Methyl Stearate (mol%) |
|-------------------------|--------------------|-------------------------|------------------------|-------------------------|-------------------------|------------------------|
| Initial                 | 4,510              | 23.2                    | 20.6                   | 19.7                    | 19.6                    | 16.8                   |
| Fraction 1              | 46.1               | 31.0                    | 21.5                   | 18.9                    | 15.5                    | 13.0                   |
| Fraction 2              | 10.2               | 31.8                    | 21.6                   | 17.6                    | 16.3                    | 12.7                   |
| Fraction 3              | 53.7               | 31.1                    | 23.2                   | 18.5                    | 15.2                    | 12.0                   |
| Fraction 4              | 91.8               | 30.9                    | 24.1                   | 18.5                    | 15.4                    | 11.0                   |
| Fraction 5 <sup>b</sup> | 85.5               | 27.7                    | 24.9                   | 19.0                    | 16.5                    | 11.9                   |
| Total Permeate          | 287                | 30.3                    | 23.4                   | 18.6                    | 15.8                    | 11.9                   |
| Retention               | 3,920              | 22.1                    | 22.0                   | 19.7                    | 20.1                    | 16.1                   |

<sup>a</sup> Initial composition was determined by removing a 1 mL sample of the initial mixture and analyzing via gas chromatography-mass spectrometry (GC-MS).

<sup>b</sup>Fraction 5 is the sample that was on the permeate side of the dead-end filtration and did not go into the vial. This sample was collected by washing the end of the metal apparatus with DCM and removing DCM to obtain the FAMES.
